# Supplementary material
Source: publisher site journal article supplement (https://www.dovepress.com/article/496944)
Supplement: Supplementary file 1 [file get_supplementary_file.php]

**Supplementary Material**

**Figure S1. Flowchart of this study**

**Figure S2. Visualization of the hippocampal subfield segmentations for a single subject**

**Table S1. Partial correlation between cognitive scores and hippocampal subfield volume in KOA individuals and HCs.**

**Table S2. Partial correlation between cognitive scores and KOOS subscales in KOA individuals and HCs.**

**Table S3. Partial correlation between hippocampal subfield volume and serum TIM-3 levels in KOA individuals.**

**Figure S1. Flowchart of this study**


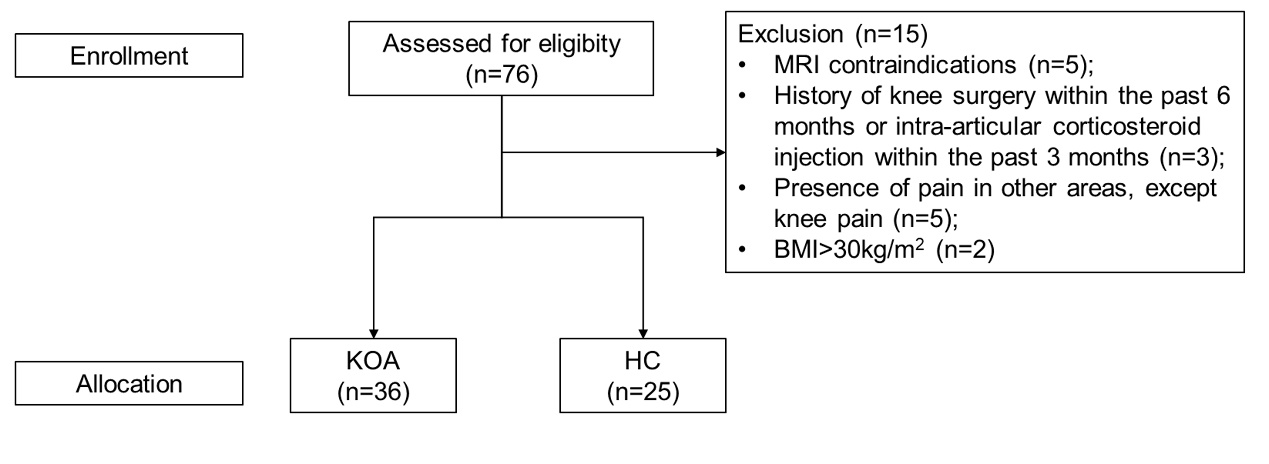


**Figure S2. Visualization of the hippocampal subfield segmentations for a single subject**


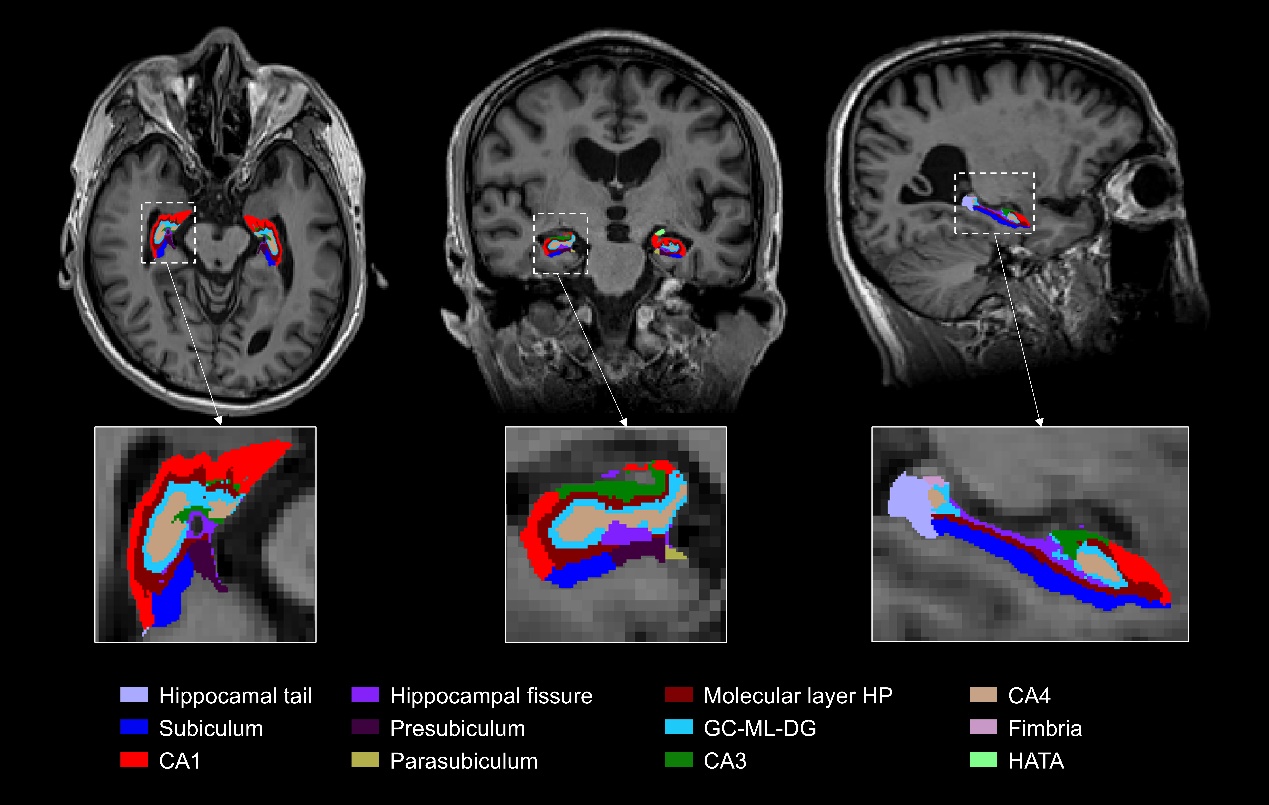


**Abbreviations:** GC-ML-DG, molecular layer of the dentate gyrus; HATA, hippocampal amygdala transition area.

**Table S1.** **Partial correlation** **between cognitive scores and hippocampal subfield volume** **in KOA individuals and HCs.**

|  | **MoCA scores** | | **DCT-Correct responses** | |
| --- | --- | --- | --- | --- |
| ***KOA (n=36)*** | **r** | ***P*** | **r** | ***P*** |
| left hippocampal fissure | -0.082 | 0.663 | 0.187 | 0.314 |
| right hippocampal tail | -0.168 | 0.366 | -0.356 | 0.049 |
| right subiculum | -0.078 | 0.675 | 0.042 | 0.823 |
| right hippocampal fissure | 0.235 | 0.204 | 0.159 | 0.393 |
| ***HCs (n=25)*** |  |  |  |  |
| left hippocampal fissure | -0.554 | 0.009 | -0.199 | 0.388 |
| right hippocampal tail | 0.643 | 0.002 | 0.349 | 0.121 |
| right subiculum | 0.441 | 0.045 | -0.305 | 0.178 |
| right hippocampal fissure | -0.187 | 0.417 | -0.044 | 0.849 |

**Notes: Abbreviations:** KOA, knee osteoarthritis; HCs, healthy controls; MoCA, the Montreal Cognitive Assessment; DCT, digit cancellation test; Correct responses, the number of digits of correct responses.

**Table S2.** **Partial correlation between cognitive scores and** **KOOS subscales in KOA individuals and HCs.**

|  | **MoCA scores** | | **DCT-Correct responses** | |
| --- | --- | --- | --- | --- |
|  | **r** | ***P*** | **r** | ***P*** |
| ***KOA (n=36)*** |  |  |  |  |
| Pain | 0.349 | 0.059 | 0.123 | 0.519 |
| Symptoms | 0.227 | 0.227 | -0.028 | 0.884 |
| ADL | 0.444 | 0.014 | 0.230 | 0.221 |
| Sport | 0.313 | 0.092 | 0.231 | 0.219 |
| Quality of life | 0.167 | 0.378 | 0.161 | 0.395 |
| ***HCs (n=25)*** |  |  |  |  |
| Pain | 0.071 | 0.754 | -0.141 | 0.530 |
| Symptoms | -0.059 | 0.795 | -0.184 | 0.413 |
| ADL | 0.218 | 0.330 | -0.060 | 0.792 |
| Sport | 0.168 | 0.454 | 0.303 | 0.171 |
| Quality of life | -0.049 | 0.827 | 0.034 | 0.881 |

**Notes: Abbreviations:** KOA, knee osteoarthritis; HCs, healthy controls; MoCA, the Montreal Cognitive Assessment; DCT, digit cancellation test; Correct responses, the number of digits of correct responses; ADL, the KOOS subtest of activities of daily living; Sport, the KOOS subtest of sport and recreation function; Quality of life, the KOOS subtest of knee-related quality of life.

**Table S3. Partial correlation between hippocampal subfield volume and** **serum TIM-3 levels in KOA individuals.**

| **The volume of the hippocampal subfields** | **Tim-3** | |
| --- | --- | --- |
| **r** | ***P*** |
| left hippocampal fissure | -0.404 | 0.030 |
| right hippocampal tail | 0.077 | 0.692 |
| right subiculum | -0.072 | 0.710 |
| right hippocampal fissure | -0.144 | 0.455 |

**Notes: Abbreviations:** KOA, knee osteoarthritis; TIM-3, T-cell immunoglobulin and mucin-domain containing-3 protein.
